# Supplementary material
Source: PubMed Central journal article supplement (PMC5313115)
Supplement: 10.1074_M116.752014_jbc.M116.752014-1.pdf [file 10.1074_M116.752014_jbc.M116.752014-1.pdf]

## Supplementary material

### **A two-component NOX-like system in bacteria is involved in the electron transfer chain to the methionine sulfoxide reductase MsrP**

Céline Juillan-Binard<sup>a,b,c,1</sup>, Antoine Picciocchi<sup>a,b,c,1</sup>, Jean-Pierre Andrieu<sup>a,b,c</sup>, Jerome Dupuy<sup>a,b,c</sup>, Isabelle Petit-Hartlein<sup>a,b,c</sup>, Christelle Caux-Thang<sup>d,e,f</sup>, Corinne Vivès<sup>a,b,c</sup>, Vincent Nivière<sup>d,e,f</sup>, Franck Fieschi<sup>a,b,c,\*</sup>.

<sup>a</sup>Univ. Grenoble Alpes, Institut de Biologie Structurale, 38044 Grenoble, France; <sup>b</sup>CEA, IBS, 38027 Grenoble France ; <sup>c</sup>CNRS, IBS, 38027 Grenoble, France ; <sup>d</sup>Univ. Grenoble Alpes; <sup>e</sup>CNRS LCBM UMR 5249; <sup>f</sup>CEA-DRF-BIG-Laboratoire de Chimie et Biologie des Métaux, 17 rue des Martyrs, 38054 Grenoble, France

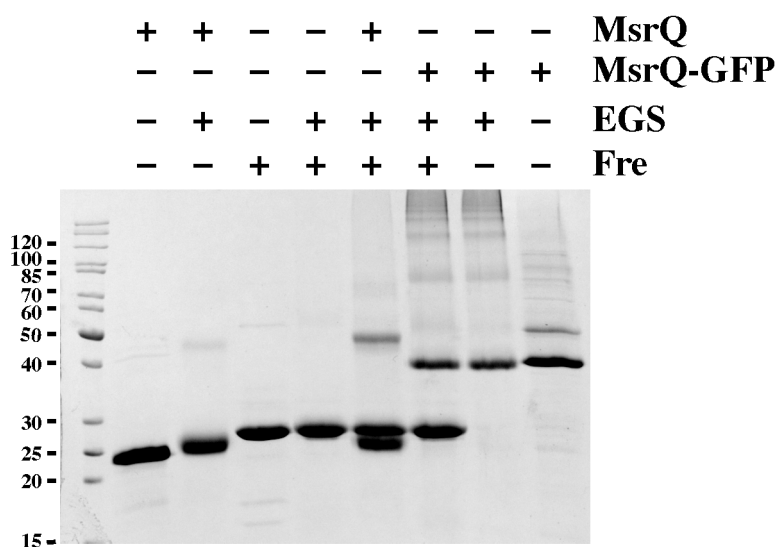

**Figure S1: Interaction analysis between Fre and MsrQ or between Fre and MsrQ-GFP fusion.** Purified proteins ((MsrQ, 10  $\mu$ L at 1 mg/mL), MsrQ-GFP (10  $\mu$ L at 1 mg/mL) and Fre (10  $\mu$ L at 1 mg/mL) were first pre-incubated during 1 hour, alone or together, without the cross-linking reagent. As indicated above the gels, the cross-linking reactions were then started, by adding (+) or not (-) 0.5 mM EGS. After 20 min incubation, the reactions were immediately subjected to a SDS-PAGE analysis.

From this SDS-PAGE analysis, a clear crosslink between MsrQ and Fre is observed (see the band at 50 kDa, lane 4 from the right.). No crosslink is observed between Fre and the MsrG-GFP fusion, where GFP is present on the cytosolic side of MsrQ (see lane 3 from the right, showing no additional crosslink band when comparing to control lane 2). These data demonstrate that the crosslink interface between Fre and MsrQ is located on the cytosolic side of MsrQ.

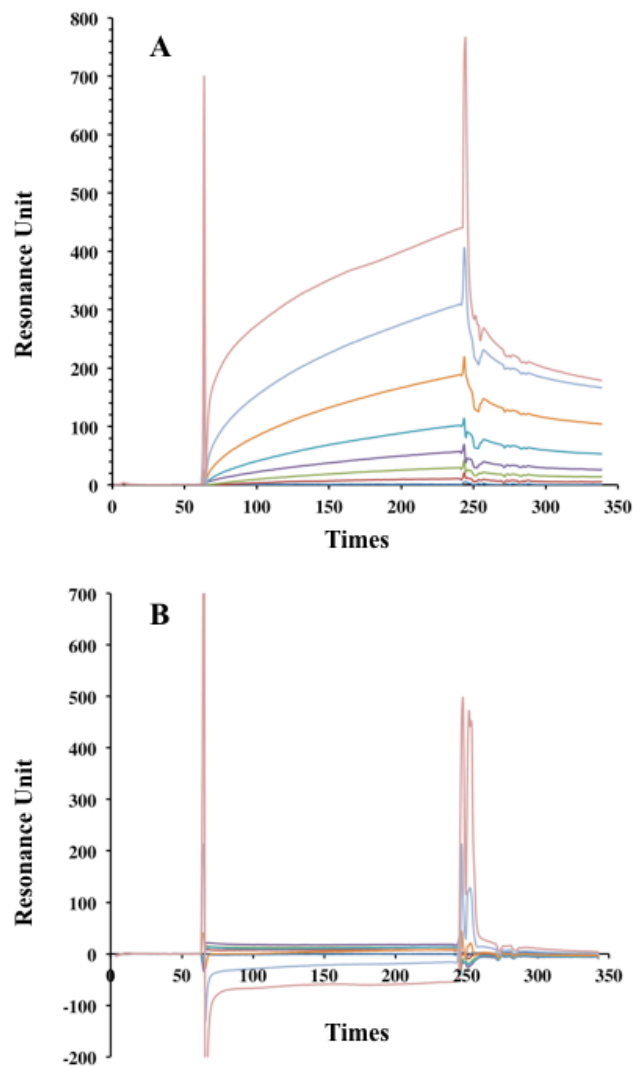

**Figure S2: Surface plasmon resonance analysis of MsrQ binding to immobilized *E.coli* flavin reductase Fre (A) or to Bovine Serum Albumine (B).** The purified MsrQ protein (60  $\mu\text{L}$ ) was injected over a Fre and BSA functionalized surface at a flow rate of 20  $\mu\text{L}/\text{min}$  with 50 mM Tris-HCl pH 8.0; 0.016% DDM and 50 mM NaCl as running Buffer. The sensorgram was obtained for a range of MsrQ concentration at 120, 60, 30, 10, 3, 1 and 0.3  $\mu\text{M}$  (from top to bottom).
